# Supplementary material for: Slight changes in the chemical structure of haemanthamine greatly influence the effect of the derivatives on rumen fermentation in vitro
Source: PubMed Central journal article supplement (PMC6385227; doi:10.1038/s41598-019-38977-x), 2019-02-21
Supplement: 41598_2019_38977_MOESM1_ESM.pdf [file 41598_2019_38977_MOESM1_ESM.pdf]

## Supplementary information

### Slight changes in the chemical structure of haemanthamine greatly influence the effect of the derivatives on rumen fermentation *in vitro*

Eva Ramos-Morales<sup>1\*</sup>, Jamie Tibble-Howlings<sup>2</sup>, Laura Lyons<sup>3</sup>, Patrick J. Murphy<sup>2</sup>, Radek Braganca<sup>2</sup>, Magnus O. Ogbu<sup>2</sup> and Charles James Newbold<sup>1</sup>

### Synthesis of compounds 2-10

**Compound 2.** (3S,4aS,11bS,12R)-3-methoxy-4,4a-dihydro-3H,6H-11b,5-ethano[1,3]dioxolo[4,5-j]phenanthridin-12-yl acetate

Pyridine (1.34 mL, 16.6 mmol) and DMAP (10 mg) were added to a solution of haemanthamine **1** (1.00 g, 3.32 mmol) dissolved in dichloromethane (20 mL). The mixture was cooled (0 °C) and acetic anhydride (0.94 mL, 9.96 mmol) was added slowly. The resultant mixture was stirred until complete consumption of starting material. The reaction was washed with NaOH solution (1 M, 3 x 30 mL) and brine (3 x 30 mL), dried (MgSO<sub>4</sub>) and evaporated under reduced pressure. The crude product was purified using silica gel flash chromatography (1-5% MeOH in chloroform, gradient elution) to give **2** (1.10 g, 3.20 mmol, 97% yield) as a gum. R<sub>f</sub> = 0.48 (10% MeOH in DCM); <sup>1</sup>H NMR (400 MHz, CDCl<sub>3</sub>): δ 6.89 (1H, s, CH), 6.46 (1H, s, CH), 6.34 (1H, d, *J* 10.1 Hz, CH), 6.16 (1H, dd, *J* 4.6, 10.1 Hz, CH), 5.89 (2H, s, CH<sub>2</sub>), 4.96 (1H, dd, *J* 3.4, 7.0 Hz, CH), 4.35 (1H, d, *J* 16.8 Hz, CH), 3.83-3.86 (1H, m, CH), 3.73 (1H, d, *J* 16.8), 3.40 (1H, dd, *J* 7.2, 14.5, CH), 3.53 (3H, s, CH<sub>3</sub>), 3.13 (1H, dd, *J* 3.6, 14.5 Hz, CH), 2.05 (1H, dd, *J* 4.5, 13.6, CH), 1.97 (3H, s, CH<sub>3</sub>), 1.92 (1H, dd, *J* 5.2, 13.6 Hz, CH); <sup>13</sup>C NMR (125MHz, CDCl<sub>3</sub>): δ 170.2, 146.8, 146.6, 134.4, 129.7, 127.8, 126.5, 106.7, 104.1, 101.0, 80.5, 77.2, 72.6, 63.0, 61.3, 60.7, 56.7, 49.3, 28.5, 21.4 ppm; ν<sub>max</sub> 2932, 2821, 1737, 1483, 1240, 1035, 754 cm<sup>-1</sup>; MS(CI) 344.2 (100%, [M+H<sup>+</sup>]) 687.3 (10%, [2M+H<sup>+</sup>]); HRMS(ES) found 344.1490, C<sub>19</sub>H<sub>22</sub>O<sub>5</sub>N ([M+H<sup>+</sup>]) requires 344.1492.

**Compound 3.** (3S,4aS,11bS,12R)-3-methoxy-4,4a-dihydro-3H,6H-11b,5-ethano[1,3]dioxolo[4,5-j]phenanthridin-12-yl butyrate

Pyridine (1.34 mL, 16.6 mmol) and DMAP (10 mg) were added to a solution of haemanthamine **1** (1.00 g, 3.32 mmol) dissolved in dichloromethane (20 mL). The mixture was cooled (0 °C) and *n*-butanoyl chloride (1.03 mL, 9.96 mmol) was added slowly. The resultant mixture was stirred until complete consumption of starting material. The reaction was washed with NaOH solution (1 M, 3 x 30 mL) and brine (3 x 30 mL), dried (MgSO<sub>4</sub>) and evaporated under reduced pressure. The crude product was purified using silica gel flash chromatography (1-5% MeOH in chloroform, gradient elution) to give **3** (1.125 g, 3.03 mmol, 92% yield) as a gum. R<sub>f</sub> = 0.53 (10% MeOH in DCM); <sup>1</sup>H NMR (400 MHz, CDCl<sub>3</sub>): δ 6.88 (1H, s, CH), 6.44 (1H, s, CH), 6.33 (1H, d,

*J* 10.1 Hz, CH), 6.12 (1H, dd, *J* 5.0, 10.0 Hz, CH), 5.87 (2H, s, CH<sub>2</sub>), 4.96 (1H, dd, *J* 3.5, 7.1 Hz, CH), 4.33 (1H, d, *J* 16.9, CH), 3.83-3.79 (1H, m, CH), 3.69 (1H, d, *J* 16.9 Hz, CH), 3.41-3.53 (1H, m, CH), 3.34 (3H, s, CH<sub>3</sub>), 3.28 (1H, dd, *J* 3.5, 14.3 Hz, CH), 2.18 (2H, td, *J* 2.7, 7.4 Hz, CH<sub>2</sub>), 2.02 (1H, dd, *J* 4.8, 13.6 Hz, CH), 1.92 (1H, td, *J* 4.2, 13.4 Hz, CH), 1.57 (2H, hextet, *J* 7.39 Hz, CH<sub>2</sub>), 0.91 (3H, t, *J* 7.4 Hz, CH<sub>3</sub>); <sup>13</sup>C NMR (125 MHz, CDCl<sub>3</sub>): δ 172.7, 146.7, 146.5, 134.5, 129.6, 127.9, 126.7, 106.7, 104.0, 101.0, 80.2, 72.7, 62.9, 61.3, 60.8, 56.6, 49.3, 36.5, 28.5, 18.4, 13.8 ppm; ν<sub>max</sub> 3020, 2935, 2401, 1730, 1483, 1216, 755 cm<sup>-1</sup>; MS(CI) 372.2 (100%, [M+H<sup>+</sup>]) 743.4 (15%, [2M+H<sup>+</sup>]); HRMS(ES) found 372.1801, C<sub>21</sub>H<sub>26</sub>O<sub>5</sub>N ([M+H<sup>+</sup>]) requires 372.1805

**Compound 4.** (3*S*,4*aS*,11*bS*,12*R*)-3-methoxy-4,4*a*-dihydro-3*H*,6*H*-11*b*,5-ethano[1,3]dioxolo[4,5-*j*]phenanthridin-12-yl pivalate

Triethylamine (1.39 mL, 9.96 mmol) and DMAP (10 mg) were added to a solution of haemanthamine **1** (1.0 g, 3.32 mmol) in dichloromethane (20 mL). The mixture was cooled (0 °C) and pivaloyl chloride (1.22 mL, 9.96 mmol) was added slowly and allowed to stir until complete consumption of the starting material. The sample was then washed subsequently with 1 M NaOH solution (3 x 30 mL) and brine (3 x 30 mL) then dried (MgSO<sub>4</sub>) and evaporated under reduced pressure. The product was then purified using flash column chromatography (1-10% MeOH in chloroform, gradient elution) to give **4** (520 mg, 1.35 mmol, 41% yield) as a gum. R<sub>f</sub> = 0.61 (10% MeOH in DCM); <sup>1</sup>H NMR (400 MHz, CDCl<sub>3</sub>): δ 6.91 (1H, s, CH), 6.47 (1H, s, CH), 6.35 (1H, d, *J* 10.1 Hz, CH), 6.15 (1H, dd, *J* 5.0, 10.0 Hz, CH), 5.89 (2H, s, CH<sub>2</sub>), 4.92 (1H, dd, *J* 3.3, 7.1 Hz, CH), 4.36 (1H, d, *J* 16.9 Hz, CH), 3.80-3.86 (1H, m, CH), 3.72 (1H, d, *J* 6.9 Hz, CH), 3.38-3.43 (1H, m, CH), 3.36 (3H, s, CH<sub>3</sub>), 3.26 (1H, dd, *J* 3.3, 14.3 Hz, CH), 2.05 (1H, dd, *J* 4.5, 13.7 Hz, CH), 1.94 (1H, td, *J* 4.2, 13.5 Hz, CH), 1.14 (9H, s, 3 x CH<sub>3</sub>); <sup>13</sup>C NMR (125 MHz, CDCl<sub>3</sub>): δ 177.5, 146.7, 146.5, 134.4, 129.5, 127.9, 126.6, 106.7, 104.0, 101.0, 79.9, 72.8, 62.9, 61.3, 60.9, 56.6, 53.5, 49.3, 28.4, 27.2 ppm; ν<sub>max</sub> 2930, 1725, 1483, 1156 cm<sup>-1</sup>; MS(CI) 386.2 (100%, [M+H<sup>+</sup>]) ; HRMS(ES) found 386.1954, C<sub>22</sub>H<sub>28</sub>O<sub>5</sub>N ([M+H<sup>+</sup>]) requires 386.1962

**Compound 5.** (3*S*,4*aS*,11*bS*,12*R*)-3-methoxy-4,4*a*-dihydro-3*H*,6*H*-11*b*,5-ethano[1,3]dioxolo[4,5-*j*]phenanthridin-12-yl hexanoate

Triethylamine (1.39 mL, 9.96 mmol) and DMAP (10 mg) were added to a solution of haemanthamine **1** (1.0 g, 3.32 mmol) in dichloromethane (20 mL). The mixture was cooled (0 °C) and n-hexanoyl chloride (1.39 mL, 9.96 mmol) was added slowly and allowed to stir until complete consumption of the starting material. The sample was then washed subsequently with 1 M NaOH solution (3 x 30 mL) and brine (3 x 30 mL) then dried (MgSO<sub>4</sub>) and evaporated under reduced pressure. The product was then purified using flash column chromatography (1-10% MeOH in chloroform, gradient elution) to give **5** (1.146 g, 3.03 mmol, 91% yield) as a gum. R<sub>f</sub> = 0.73 (10% MeOH in DCM); <sup>1</sup>H NMR (400 MHz, CDCl<sub>3</sub>): δ 6.89 (1H, s, CH), 6.45 (1H, s, CH), 6.33 (1H, d, *J* 10.1 Hz, CH), 6.13 (1H, dd, *J* 5.0, 10.0 Hz, CH), 5.87 (2H, s, CH<sub>2</sub>), 4.96 (1H, dd, *J* 3.5, 7.0

Hz, CH), 4.34 (1H, d, *J* 16.8 Hz, CH), 3.79-3.84 (1H, m, CH), 3.70 (1H, d, *J* 16.8 Hz, CH), 3.39 (1H, dd, *J* 7.1, 15.4 Hz, CH), 3.34 (3H, s, CH<sub>3</sub>), 3.29 (1H, dd, *J* 3.5, 14.4, CH), 2.19 (2H, td, *J* 2.7, 7.4 Hz, CH<sub>2</sub>), 2.03 (1H, dd, *J* 4.3, 13.6 Hz, CH), 2.03 (1H, dd, *J* 4.3, 13.6 Hz, CH), 1.93 (1H, td, *J* 4.2, 12.4 Hz, CH), 1.54 (2H, p, *J* 7.44 Hz, CH<sub>2</sub>), 1.22-1.33 (4H, m, 2 x CH<sub>2</sub>), 0.88 (3H, t, *J* 6.8 Hz, CH<sub>3</sub>); <sup>13</sup>C NMR (125 MHz, CDCl<sub>3</sub>): δ 172.9, 146.8, 146.6, 134.5, 129.6, 128.0, 126.7, 106.7, 104.1, 101.0, 80.3, 72.7, 62.9, 61.4, 60.8, 56.7, 49.3, 34.6, 31.4, 28.5, 24.7, 22.4, 14.0 ppm; *v*<sub>max</sub> 2957, 2871, 1736, 1484, 1240, 1091, 755 cm<sup>-1</sup>; MS(CI) 400.2 (55%, [M+H<sup>+</sup>]); HRMS(ES) found 400.2115, C<sub>23</sub>H<sub>30</sub>O<sub>5</sub>N ([M+H<sup>+</sup>]) requires 400.2118

**Compound 6.** (3R,4aS,11bS,12R)-3-methoxy-2,3,4,4a-tetrahydro-1H,6H-11b,5-ethano[1,3]dioxolo[4,5-j]phenanthridin-12-ol

Under a nitrogen atmosphere, palladium on charcoal (10%, 0.1 g) was added to a solution of haemanthamine **1** (5.00 g, 16.6 mmol) dissolved in dry THF (100 mL). After evacuation, the mixture was stirred at rt under a hydrogen atmosphere for 16 hrs following which the reaction was filtered through a celite pad which was washed with excess THF and the filtrate evaporated under reduced pressure. The residue was purified by flash column chromatography (1-5% MeOH in chloroform, graduated elution) to give dihydrohaemanthamine **6** (3.62 g, 11.9 mmol, 72% yield) as a white crystalline solid. *R*<sub>f</sub> = 0.17 ((10% MeOH in DCM); <sup>1</sup>H NMR (400 MHz, CDCl<sub>3</sub>): δ 6.69 (1H, s, CH), 6.39 (1H, s, CH), 5.86 (2H, s, CH<sub>2</sub>), 4.26 (1H, d, *J* 16.70 Hz, CH), 4.10-4.04 (1H, m, CH), 3.69 (1H, s, CH), 3.64 (1H, d, *J* 16.71 Hz, CH), 3.35-3.19 (7H, m), 2.34-1.75 (6H, m); <sup>13</sup>C NMR (125 MHz, CDCl<sub>3</sub>): δ 146.3, 145.6, 139.2, 125.7, 105.9, 103.3, 100.5, 82.1, 75.4, 62.8, 62.4, 60.6, 55.4, 45.9, 29.9, 26.7, 22.6 ppm; *v*<sub>max</sub> 3028, 2924, 1509, 1228, 1045, 822, 724 cm<sup>-1</sup>; MS(CI) 304.1 (100%, [M+H<sup>+</sup>]), 607.3 (5%, [2M+H<sup>+</sup>]); HRMS(ES) found 304.1540, C<sub>17</sub>H<sub>22</sub>O<sub>5</sub>N ([M+H<sup>+</sup>]) requires 304.1543

**Compound 7.** (3R,4aS,11bS,12R)-3-methoxy-2,3,4,4a-tetrahydro-1H,6H-11b,5-ethano[1,3]dioxolo[4,5-j]phenanthridin-12-yl acetate

Pyridine (1.34 mL, 16.6 mmol) and DMAP (10 mg) were added to a solution of dihydrohaemanthamine **6** (1.00 g, 3.32 mmol) dissolved in dichloromethane (20 mL). The mixture was cooled (0 °C) and acetic anhydride (0.94 mL, 9.96 mmol) was added slowly. The resultant mixture was stirred until complete consumption of starting material. The reaction was washed with NaOH solution (1 M, 3 x 30 mL) and brine (3 x 30 mL), dried (MgSO<sub>4</sub>) and evaporated under reduced pressure. The crude product was purified using silica gel flash chromatography (1-5% MeOH in chloroform, gradient elution) to give **7** (354 mg, 1.02 mmol, 49% yield) as a gum. *R*<sub>f</sub> = 0.44 (10% MeOH in DCM); <sup>1</sup>H NMR (400 MHz, CDCl<sub>3</sub>): δ 6.76 (1H, s, CH), 6.56 (1H, s, CH), 5.94 (2H, d, *J* 3.0 Hz, CH<sub>2</sub>), 4.81 (1H, dd, *J* 3.6, 7.5 Hz, CH), 4.13 (1H, d, *J* 17.0 Hz, CH), 3.66 (1H, s, CH), 3.61 (1H, d, *J* 17.1 Hz, CH), 3.33 (4H, s, 2 x CH<sub>2</sub>), 3.23-3.31 (1H, m, CH), 3.20 (2H, s, CH<sub>2</sub>), 2.98 (2H, m, CH<sub>2</sub>), 2.19-2.33 (1H, m, CH), 1.79-1.93 (4H, m, 2 x CH<sub>2</sub>), 1.53 (1H, td, *J* 1.2, 14.4 Hz, CH); <sup>13</sup>C NMR (125 MHz, CDCl<sub>3</sub>): δ 170.1, 146.7, 146.5,

134.4, 129.5, 127.7, 126.6, 106.7, 104.0, 100.9, 80.5, 72.6, 62.9, 61.3, 60.6, 56.6, 49.3, 28.4, 21.3 ppm;  $\nu_{\max}$  3020, 1216, 756  $\text{cm}^{-1}$ ; MS(CI) 346.2 (100%,  $[\text{M}+\text{H}^+]$ ), 691.3 (5%  $[2\text{M}+\text{H}^+]$ ); HRMS(ES) found 346.1641,  $\text{C}_{19}\text{H}_{24}\text{O}_5\text{N}$  ( $[\text{M}+\text{H}^+]$ ) requires 346.1649

**Compound 8.** (3R,4aS,11bS,12R)-3-methoxy-2,3,4,4a-tetrahydro-1H,6H-11b,5-ethano[1,3]dioxolo[4,5-j]phenanthridin-12-yl butyrate

Pyridine (1.34 mL, 16.6 mmol) and DMAP (10 mg) were added to a solution of dihydrohaemanthamine **6** (1.00 g, 3.32 mmol) dissolved in dichloromethane (20 mL). The mixture was cooled (0 °C) and *n*-butanoyl chloride (1.03 mL, 9.96 mmol) was added slowly. The resultant mixture was stirred until complete consumption of starting material. The reaction was washed with NaOH solution (1 M, 3 x 30 mL) and brine (3 x 30 mL), dried ( $\text{MgSO}_4$ ) and evaporated under reduced pressure. The crude product was purified using silica gel flash chromatography (1-5% MeOH in chloroform, gradient elution) to give **8** (232 mg, 0.62 mmol, 29% yield) as a gum.  $R_f = 0.49$  (10% MeOH in DCM);  $^1\text{H}$  NMR (400 MHz,  $\text{CDCl}_3$ ):  $\delta$  6.71 (1H, s, CH), 6.40 (1H, s, CH), 5.86 (2H, s,  $\text{CH}_2$ ), 5.00 (1H, dd,  $J$  3.4, 6.9 Hz, CH), 4.28 (1H, d,  $J$  16.9 Hz, CH), 3.70 (1H, s, CH), 3.65 (1H, d,  $J$  16.8 Hz, CH), 3.37 (1H, dd,  $J$  7.1, 14.3 Hz, CH), 3.27 (3H, s,  $\text{CH}_3$ ), 3.12 (1H, dd,  $J$  3.5, 14.5 Hz, CH), 2.27 (3H, t,  $J$  7.3 Hz,  $\text{CH}_3$ ), 1.80-2.10 (5H, m), 1.56-1.68 (3H, m), 1.24 (1H, t,  $J$  7.1 Hz, CH), 0.94 (3H, t,  $J$  7.4 Hz,  $\text{CH}_3$ );  $^{13}\text{C}$  NMR (125 MHz,  $\text{CDCl}_3$ ):  $\delta$  173.0, 146.7, 146.3, 138.4, 126.3, 106.1, 104.0, 100.9, 82.5, 75.3, 62.8, 61.4, 61.0, 55.8, 45.1, 36.6, 30.4, 26.8, 22.6, 18.5, 13.7;  $\nu_{\max}$  3020, 2401, 1216, 757, 669  $\text{cm}^{-1}$ ; MS(CI) 374.2 (100%,  $[\text{M}+\text{H}^+]$ ), 747.4 (10%,  $[2\text{M}+\text{H}^+]$ ); HRMS(ES) found 374.1958,  $\text{C}_{21}\text{H}_{28}\text{O}_5\text{N}$  ( $[\text{M}+\text{H}^+]$ ) requires 374.1962.

**Compound 9.** (3R,4aS,11bS,12R)-3-methoxy-2,3,4,4a-tetrahydro-1H,6H-11b,5-ethano[1,3]dioxolo[4,5-j]phenanthridin-12-yl pivalate

Pyridine (1.34 mL, 16.6 mmol) and DMAP (10 mg) were added to a solution of dihydrohaemanthamine **6** (1.00 g, 3.32 mmol) dissolved in dichloromethane (20 mL). The mixture was cooled (0 °C) and pivaloyl chloride (1.22 mL, 9.96 mmol) was added slowly. The resultant mixture was stirred until complete consumption of starting material. The reaction was washed with NaOH solution (1 M, 3 x 30 mL) and brine (3 x 30 mL), dried ( $\text{MgSO}_4$ ) and evaporated under reduced pressure. The crude product was purified using silica gel flash chromatography (1-5% MeOH in chloroform, gradient elution) to give **9** (554 mg, 1.31 mmol, 61% yield) as a gum.  $R_f = 0.51$  (10% MeOH in DCM);  $^1\text{H}$  NMR (400 MHz,  $\text{CDCl}_3$ ):  $\delta$  6.73 (1H, s, CH), 6.41 (1H, s, CH), 5.87 (2H, s,  $\text{CH}_2$ ), 4.88 (1H, dd,  $J$  3.2, 6.7 Hz, CH), 4.31 (1H, d,  $J$  16.8 Hz, CH), 3.73 (1H, s, CH), 3.67 (1H, d,  $J$  15.9 Hz, CH), 3.41 (1H, dd,  $J$  7.0, 14.5 Hz, CH), 3.29 (3H, s,  $\text{CH}_3$ ), 3.05 (1H, dd,  $J$  3.4, 14.5, CH), 2.32-2.29 (1H, m, CH), 1.98-2.13 (4H, m, 2 x  $\text{CH}_2$ ), 1.57 (1H, t,  $J$  13.3 Hz, CH), 1.19 (9H, s, 3 x  $\text{CH}_3$ );  $^{13}\text{C}$  NMR (125 MHz,  $\text{CDCl}_3$ ):  $\delta$  178.1, 146.8, 146.4, 138.6, 126.3, 106.2, 104.1, 100.9, 83.0, 75.3, 62.9, 62.0, 61.0, 55.9, 45.1, 38.7, 30.4, 27.4, 26.8, 22.5 ppm;  $\nu_{\max}$  3020, 1216, 760  $\text{cm}^{-1}$ ; MS(CI) 388.2 (100%,  $[\text{M}+\text{H}^+]$ ),

775.4 (15%, [2M+H<sup>+</sup>]); HRMS(ES) found 388.2113, C<sub>22</sub>H<sub>30</sub>O<sub>5</sub>N ([M+H<sup>+</sup>]) requires 388.2118.

**Compound 10.** (3R,4aS,11bS,12R)-3-methoxy-2,3,4,4a-tetrahydro-1H,6H-11b,5-ethano[1,3]dioxolo[4,5-j]phenanthridin-12-yl hexanoate

Pyridine (1.34 mL, 16.6 mmol) and DMAP (10 mg) were added to a solution of dihydrohaemanthamine **6** (1.00 g, 3.32 mmol) dissolved in dichloromethane (20 mL). The mixture was cooled (0 °C) and n-hexanoyl chloride (1.39 mL, 9.96 mmol) was added slowly. The resultant mixture was stirred until complete consumption of starting material. The reaction was washed with NaOH solution (1 M, 3 x 30 mL) and brine (3 x 30 mL), dried (MgSO<sub>4</sub>) and evaporated under reduced pressure. The crude product was purified using silica gel flash chromatography (1-5% MeOH in chloroform, gradient elution) to give **10** (711 mg, 1.77 mmol, 83% yield) as a gum. R<sub>f</sub> = 0.55 (10% MeOH in DCM); <sup>1</sup>H NMR (400 MHz, CDCl<sub>3</sub>): δ 6.72 (1H, s, CH), 6.41 (1H, s, CH), 5.87 (2H, s, CH<sub>2</sub>), 5.02 (1H, dd, *J* 3.4, 7.0 Hz, CH), 4.32 (1H, d, *J* 16.8, CH), 3.69 (2H, d, *J* 16.6 Hz, CH<sub>2</sub>), 3.30-3.40 (2H, m, CH<sub>2</sub>), 3.27 (3H, s, CH<sub>3</sub>), 3.20 (1H, dd, *J* 3.4, 8.5 Hz, CH), 2.15-2.30 (4H, m), 1.81-2.15 (4H, m), 1.57-1.65 (4H, m), 1.24-1.36 (6H, m), 0.88 (3H, t, *J* 6.9 Hz, CH<sub>3</sub>); <sup>13</sup>C NMR (125 MHz, CDCl<sub>3</sub>): δ 173.2, 146.7, 146.3, 138.5, 126.5, 106.1, 104.0, 100.9, 82.6, 75.4, 62.9, 61.6, 61.1, 55.8, 45.2, 34.7, 31.4, 30.5, 26.8, 24.8, 22.6, 22.4, 14.0 ppm; ν<sub>max</sub> 3020, 2933, 1729, 1482, 1216, 757, 699 cm<sup>-1</sup>; MS(CI) 402.2 (100%, [M+H<sup>+</sup>]); HRMS(ES) found 402.2266, C<sub>23</sub>H<sub>32</sub>O<sub>5</sub>N ([M+H<sup>+</sup>]) requires 402.2275

**Supplementary Table S1.** Effect of dihydrohaemanthamine **6** and derivatives of haemanthamine **1** and dihydrohaemanthamine **6**, added at 0.125, 0.250, 0.5 or 1 g/L, on rumen protozoa activity assessed in vitro as the amount of <sup>14</sup>C-labelled bacteria broken down by rumen protozoa (% of the initial radioactivity released per hour)

|                      | Dose (g/L)        |                    |                    |                    |                    | SED   | P     |
|----------------------|-------------------|--------------------|--------------------|--------------------|--------------------|-------|-------|
|                      | 0                 | 0.125              | 0.25               | 0.5                | 1                  |       |       |
| Haemanthamine        |                   |                    |                    |                    |                    |       |       |
| derivatives          |                   |                    |                    |                    |                    |       |       |
| 2                    | 1.44 <sup>d</sup> | 1.22 <sup>cd</sup> | 1.09 <sup>bc</sup> | 0.871 <sup>b</sup> | 0.495 <sup>a</sup> | 0.123 | <.001 |
| 3                    | 1.44 <sup>b</sup> | 1.58 <sup>b</sup>  | 1.32 <sup>b</sup>  | 0.383 <sup>a</sup> | 0.270 <sup>a</sup> | 0.154 | <.001 |
| 4                    | 1.44 <sup>c</sup> | 1.34 <sup>c</sup>  | 0.735 <sup>b</sup> | 0.277 <sup>a</sup> | 0.280 <sup>a</sup> | 0.128 | <.001 |
| 5                    | 1.44 <sup>b</sup> | 1.42 <sup>b</sup>  | 1.25 <sup>b</sup>  | 0.653 <sup>a</sup> | 0.426 <sup>a</sup> | 0.130 | <.001 |
| Dihydrohaemanthamine |                   |                    |                    |                    |                    |       |       |
| derivatives          |                   |                    |                    |                    |                    |       |       |
| 6                    | 1.44 <sup>d</sup> | 1.17 <sup>c</sup>  | 1.06 <sup>c</sup>  | 0.810 <sup>b</sup> | 0.363 <sup>a</sup> | 0.111 | <.001 |
| 7                    | 1.44 <sup>c</sup> | 1.51 <sup>c</sup>  | 1.39 <sup>c</sup>  | 0.958 <sup>b</sup> | 0.483 <sup>a</sup> | 0.123 | <.001 |
| 8                    | 1.44 <sup>c</sup> | 1.38 <sup>c</sup>  | 0.942 <sup>b</sup> | 0.249 <sup>a</sup> | 0.249 <sup>a</sup> | 0.117 | <.001 |
| 9                    | 1.44 <sup>b</sup> | 1.19 <sup>b</sup>  | 0.438 <sup>a</sup> | 0.137 <sup>a</sup> | 0.201 <sup>a</sup> | 0.161 | <.001 |
| 10                   | 1.44 <sup>c</sup> | 0.844 <sup>b</sup> | 0.299 <sup>a</sup> | 0.279 <sup>a</sup> | 0.219 <sup>a</sup> | 0.151 | <.001 |

<sup>a-d</sup> Means with different superscript differ ( $n=4$ )

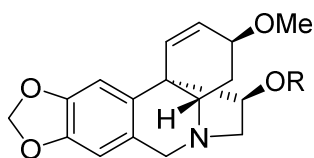

| No | R                                | Name                                                                                                        |
|----|----------------------------------|-------------------------------------------------------------------------------------------------------------|
| 1  | H                                | (3S,4aS,11bS,12R)-3-methoxy-4,4a-dihydro-3H,6H-11b,5-ethano[1,3]dioxolo[4,5-j]phenanthridin-12-ol           |
| 2  | Ac                               | (3S,4aS,11bS,12R)-3-methoxy-4,4a-dihydro-3H,6H-11b,5-ethano[1,3]dioxolo[4,5-j]phenanthridin-12-yl acetate   |
| 3  | CO <sub>n</sub> Pr               | (3S,4aS,11bS,12R)-3-methoxy-4,4a-dihydro-3H,6H-11b,5-ethano[1,3]dioxolo[4,5-j]phenanthridin-12-yl butyrate  |
| 4  | CO <sub>t</sub> Bu               | (3S,4aS,11bS,12R)-3-methoxy-4,4a-dihydro-3H,6H-11b,5-ethano[1,3]dioxolo[4,5-j]phenanthridin-12-yl pivalate  |
| 5  | COC <sub>5</sub> H <sub>11</sub> | (3S,4aS,11bS,12R)-3-methoxy-4,4a-dihydro-3H,6H-11b,5-ethano[1,3]dioxolo[4,5-j]phenanthridin-12-yl hexanoate |

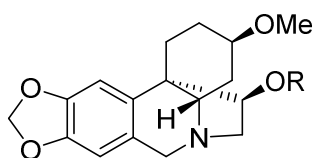

| No | R                                | Name                                                                                                               |
|----|----------------------------------|--------------------------------------------------------------------------------------------------------------------|
| 6  | H                                | (3R,4aS,11bS,12R)-3-methoxy-2,3,4,4a-tetrahydro-1H,6H-11b,5-ethano[1,3]dioxolo[4,5-j]phenanthridin-12-ol           |
| 7  | Ac                               | (3R,4aS,11bS,12R)-3-methoxy-2,3,4,4a-tetrahydro-1H,6H-11b,5-ethano[1,3]dioxolo[4,5-j]phenanthridin-12-yl acetate   |
| 8  | CO <sub>n</sub> Pr               | (3R,4aS,11bS,12R)-3-methoxy-2,3,4,4a-tetrahydro-1H,6H-11b,5-ethano[1,3]dioxolo[4,5-j]phenanthridin-12-yl butyrate  |
| 9  | CO <sub>t</sub> Bu               | (3R,4aS,11bS,12R)-3-methoxy-2,3,4,4a-tetrahydro-1H,6H-11b,5-ethano[1,3]dioxolo[4,5-j]phenanthridin-12-yl pivalate  |
| 10 | COC <sub>5</sub> H <sub>11</sub> | (3R,4aS,11bS,12R)-3-methoxy-2,3,4,4a-tetrahydro-1H,6H-11b,5-ethano[1,3]dioxolo[4,5-j]phenanthridin-12-yl hexanoate |

**Supplementary Figure S1.** Structure of haemanthamine and dihydrohaemanthamine derivatives.

# NMR data for compounds 1-10

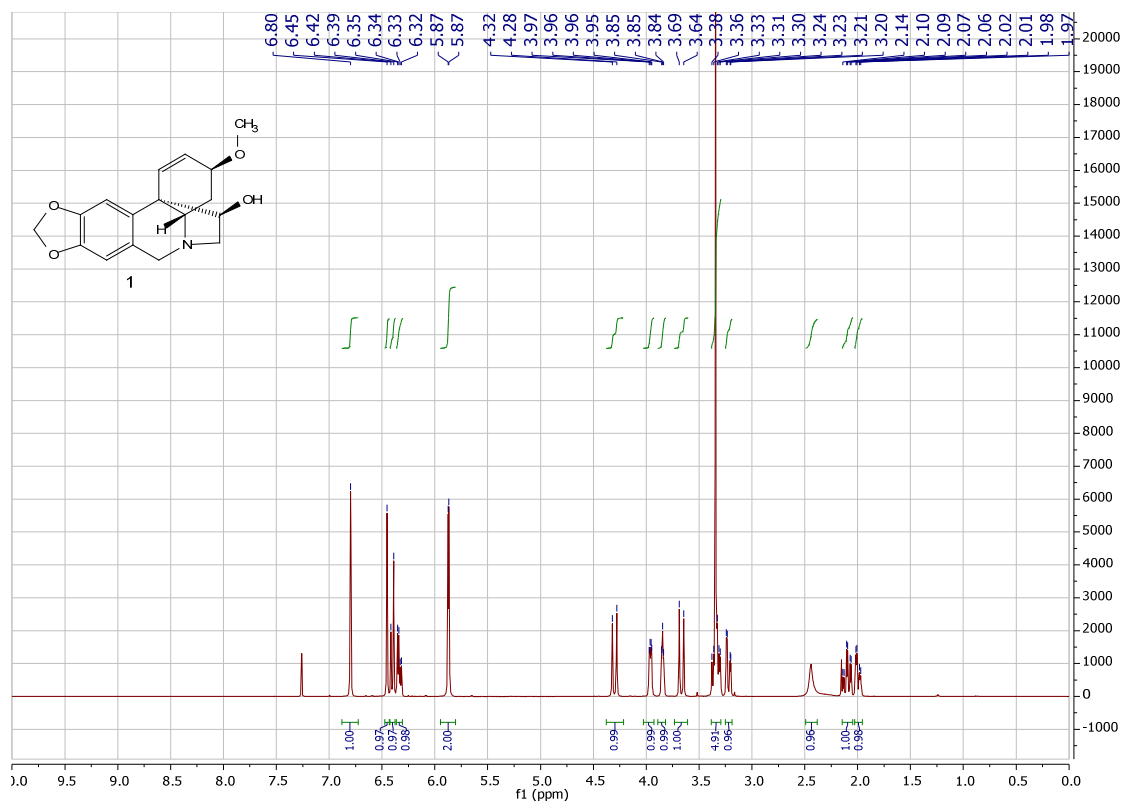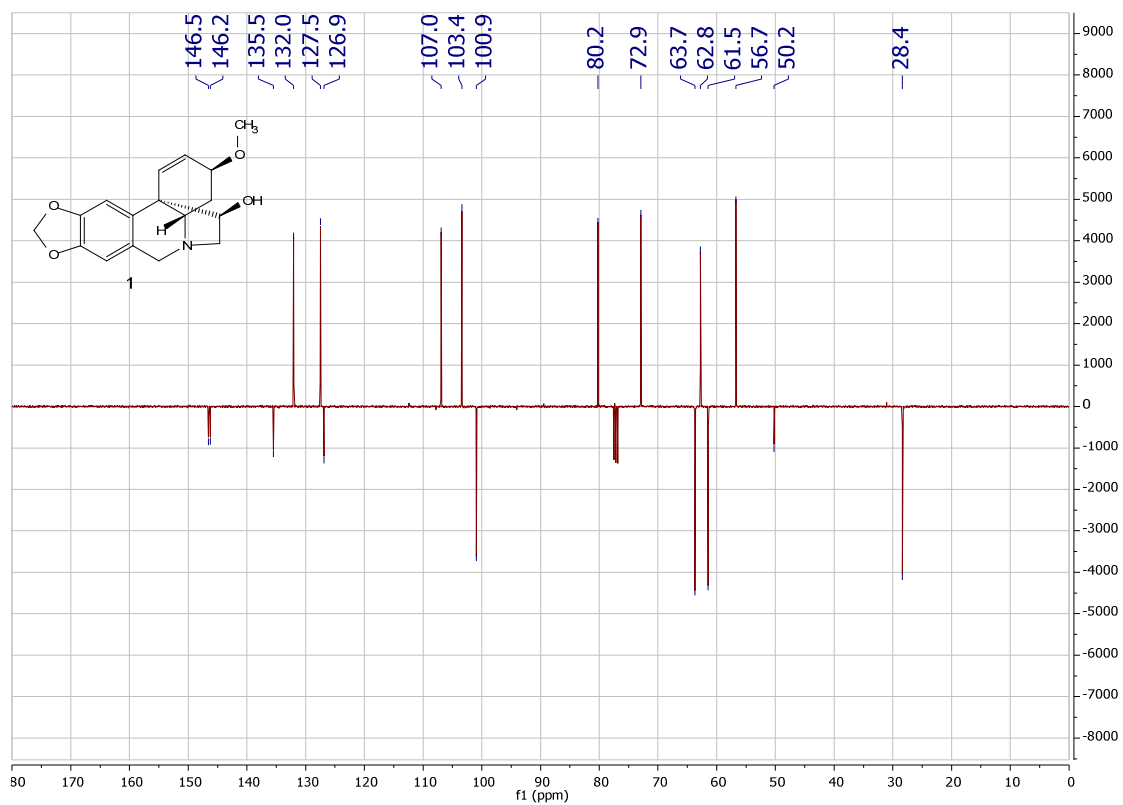



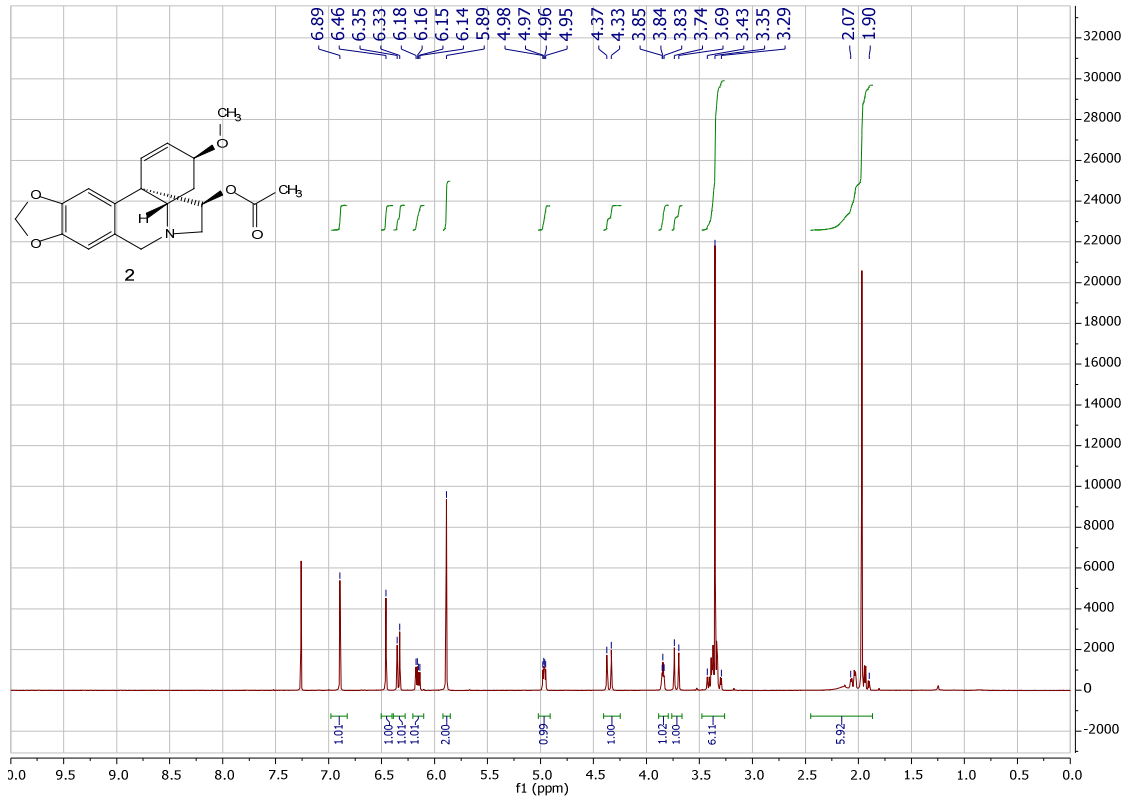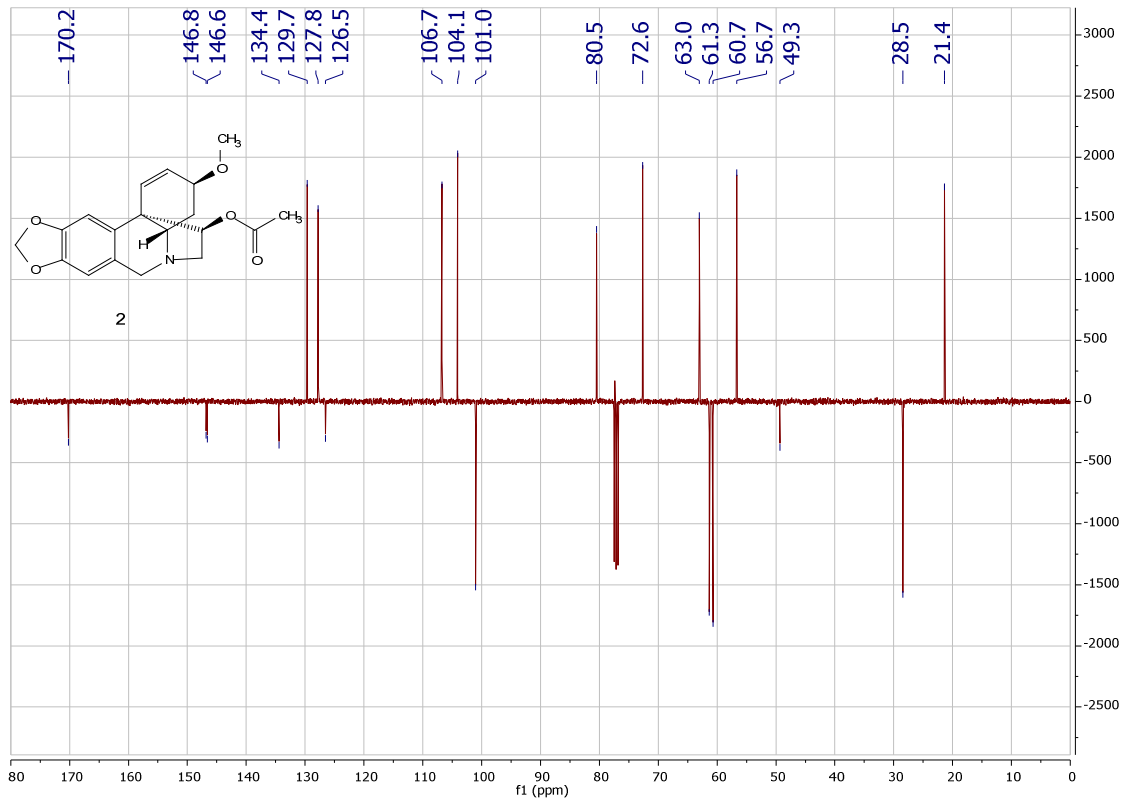

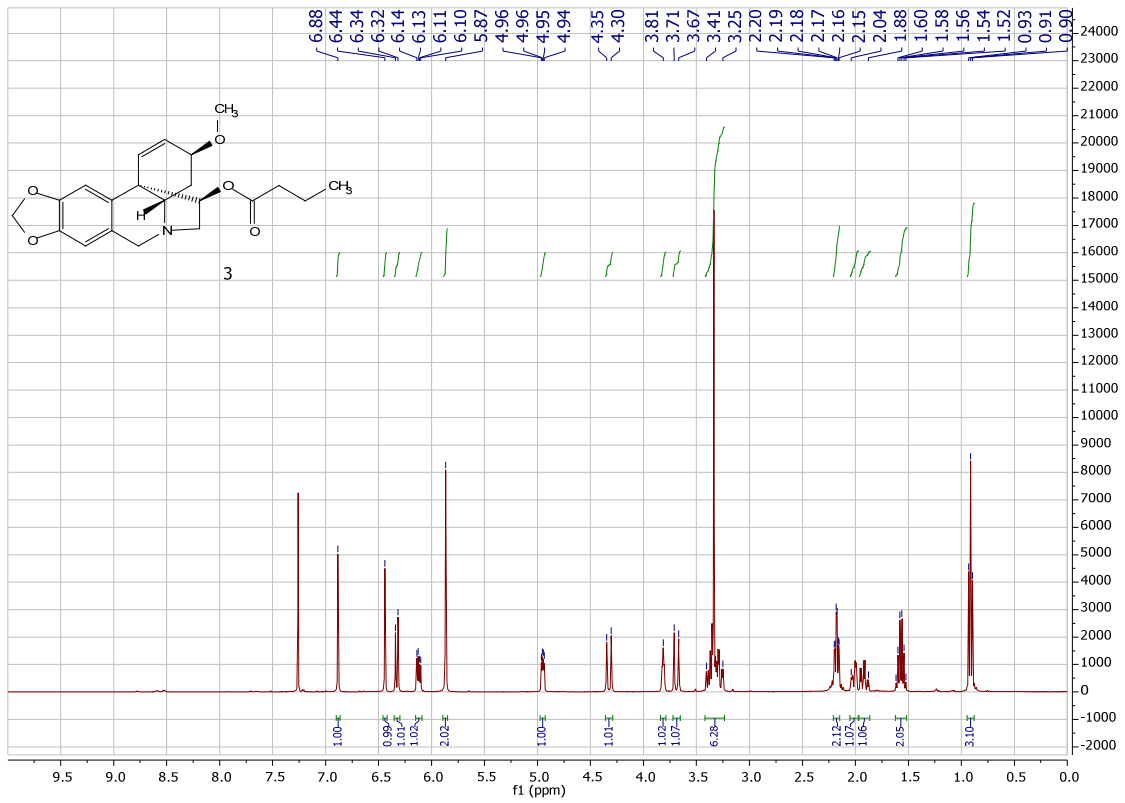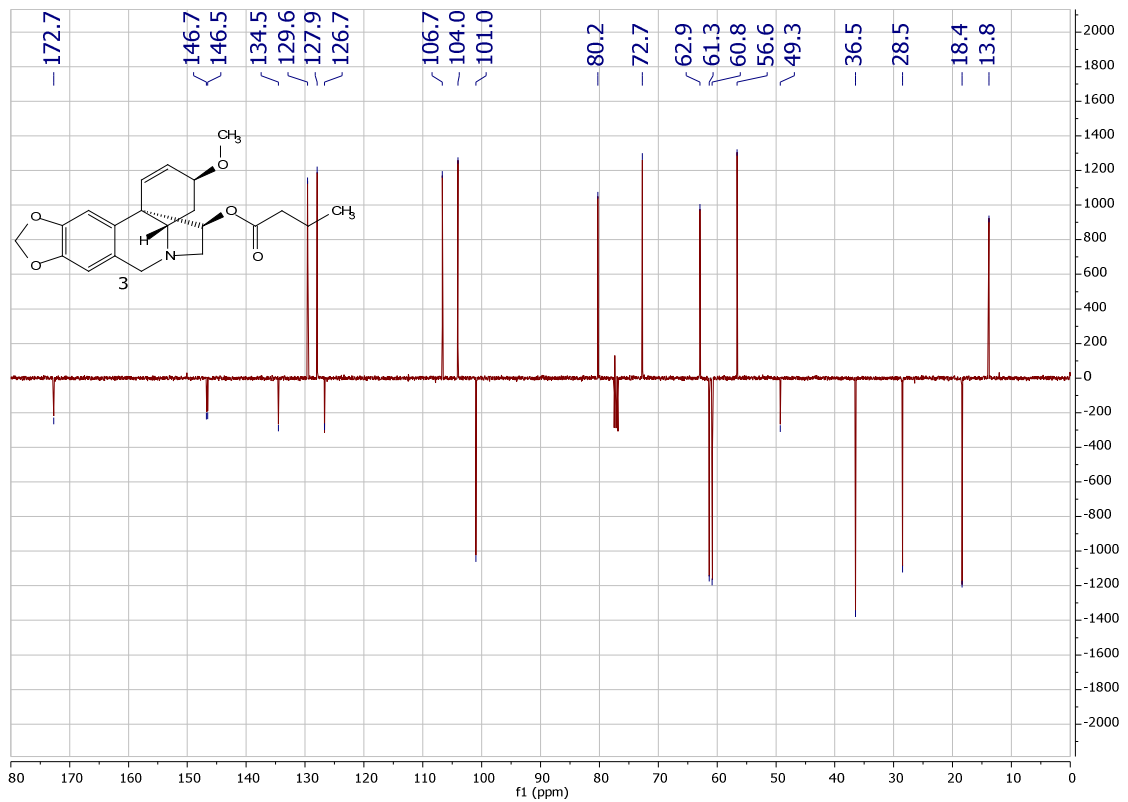

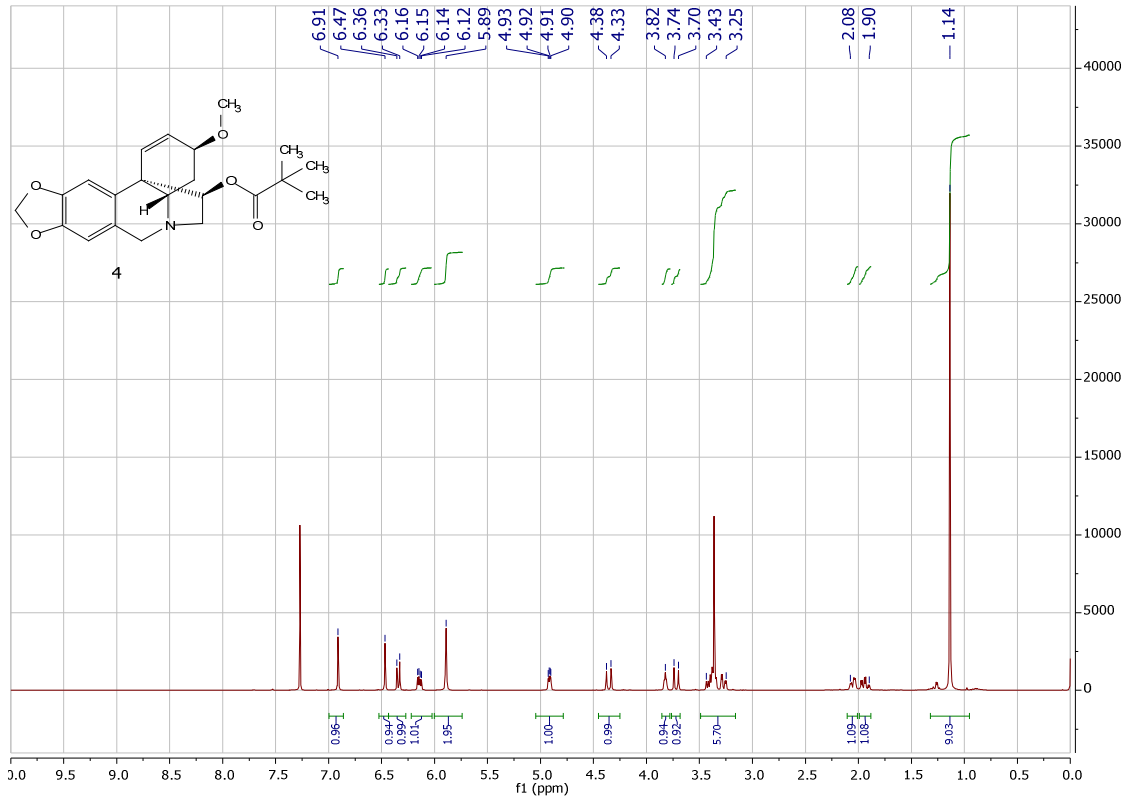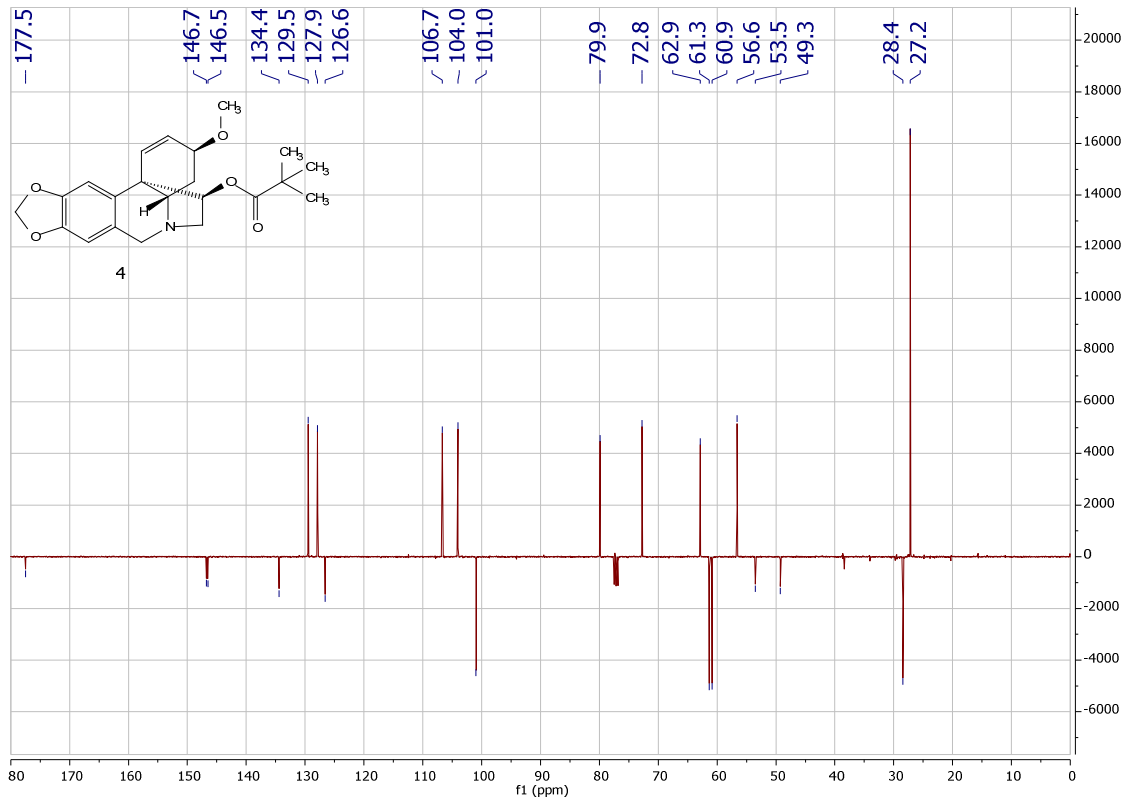

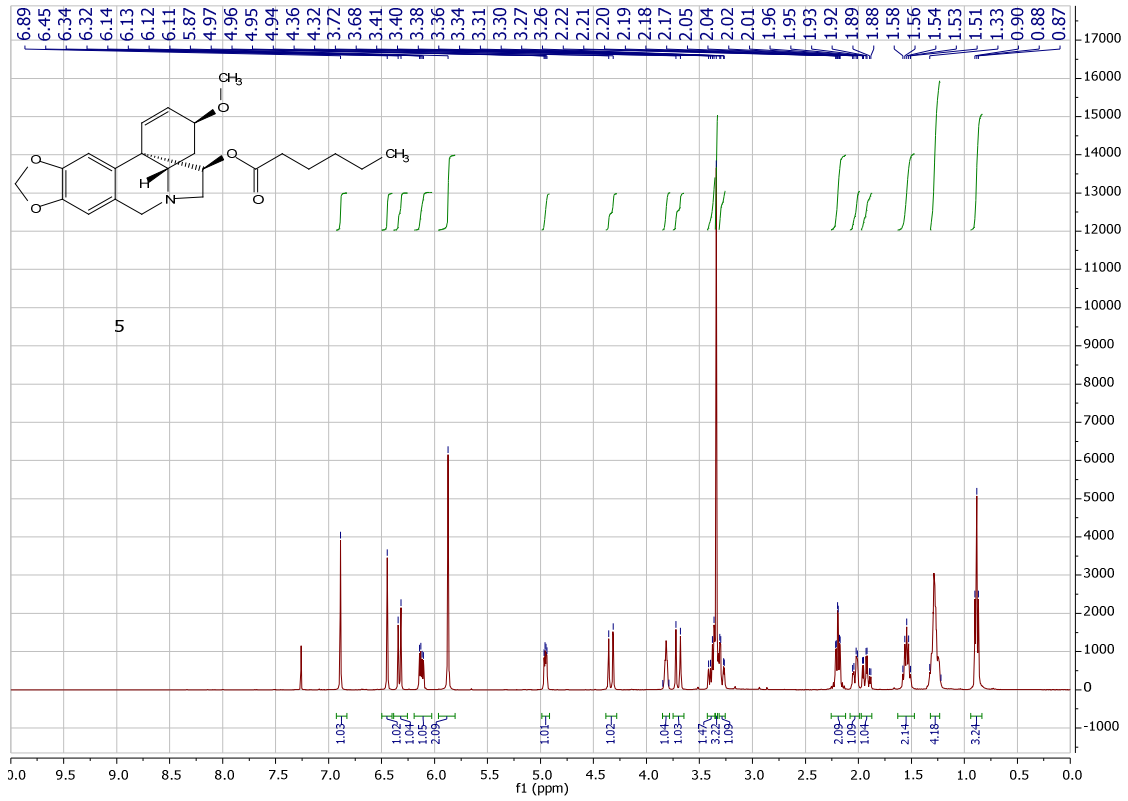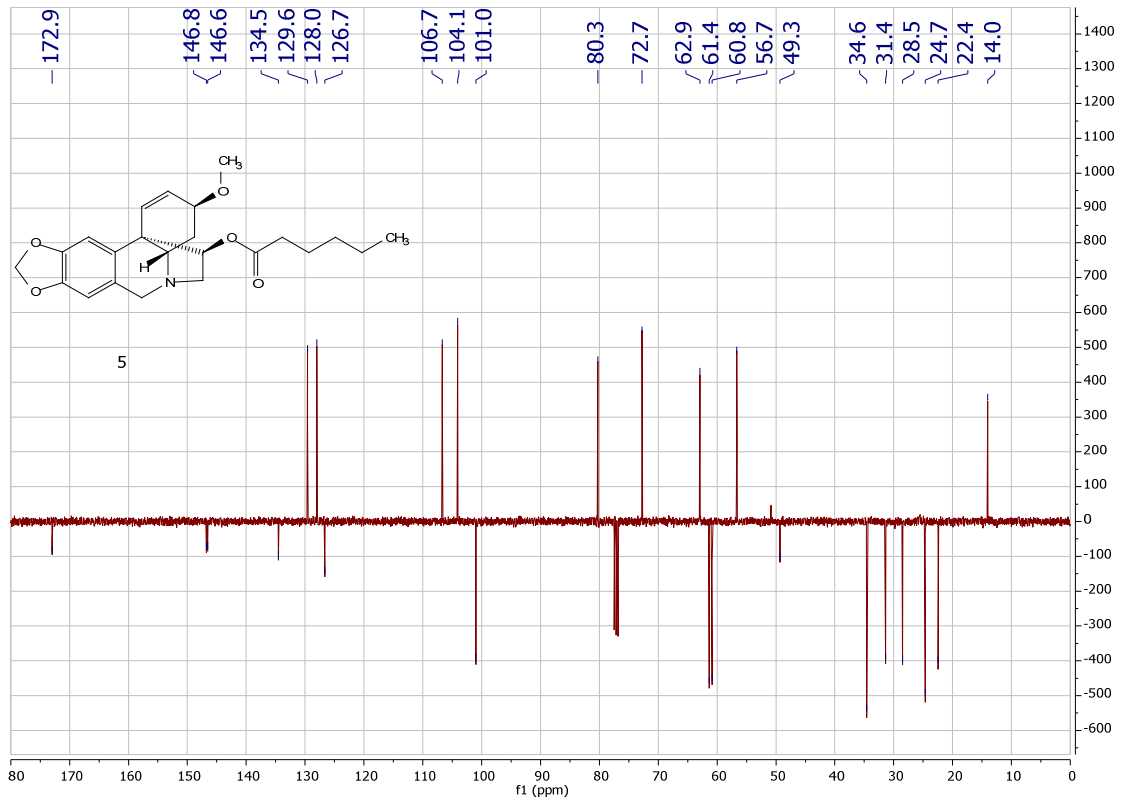

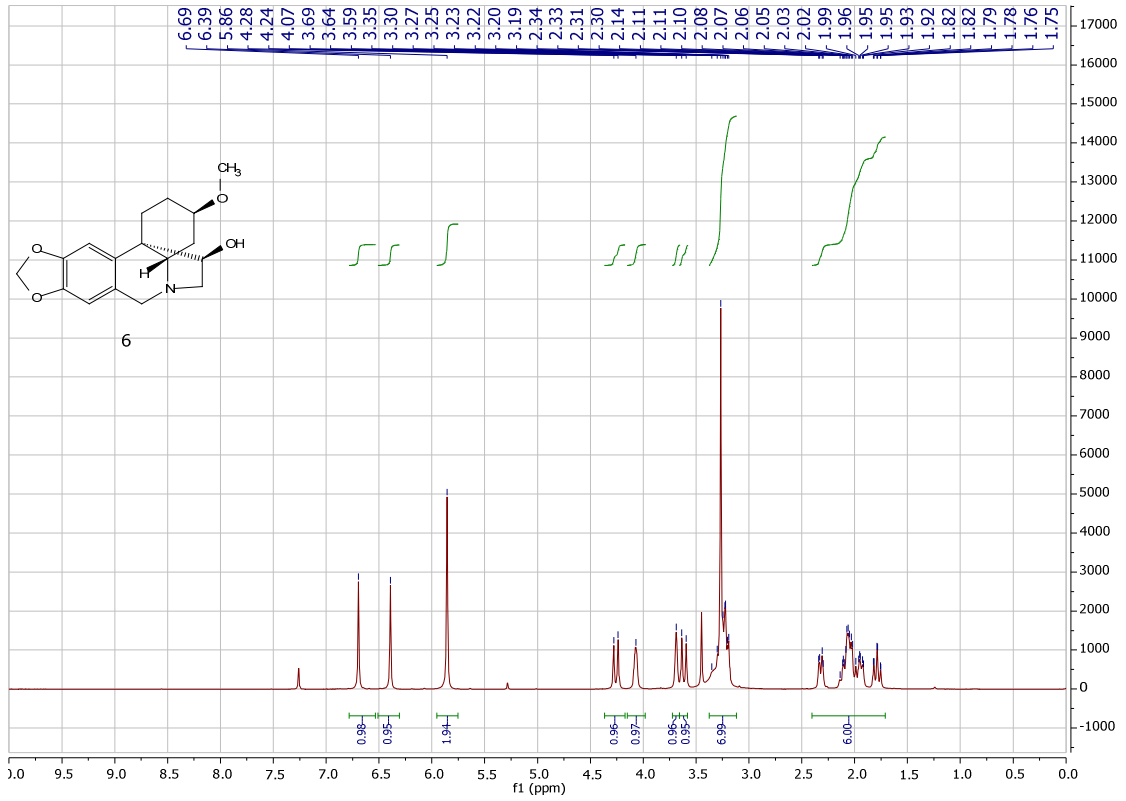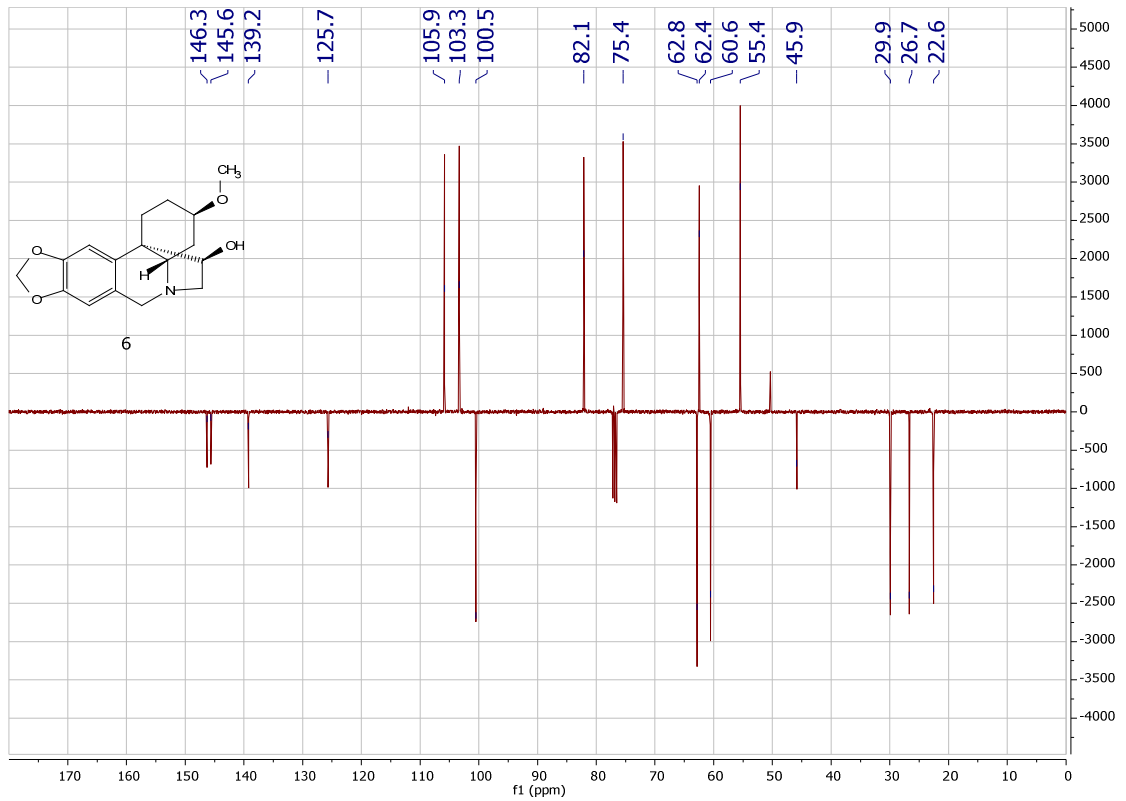

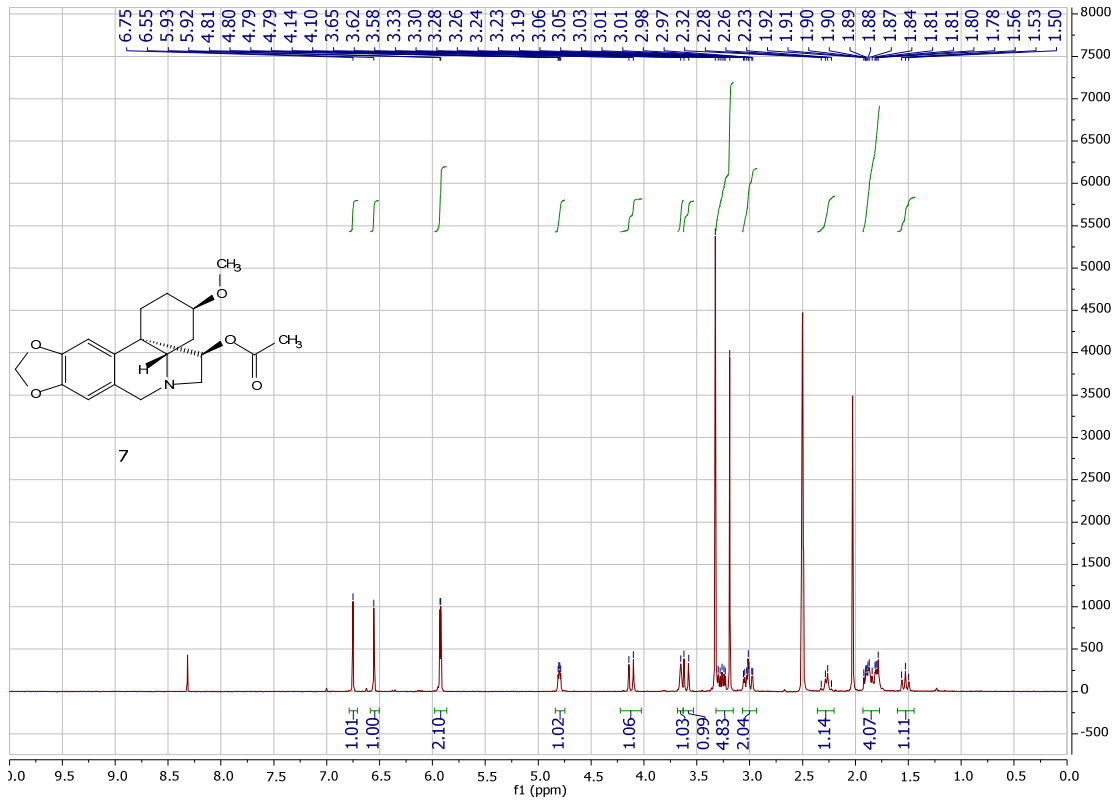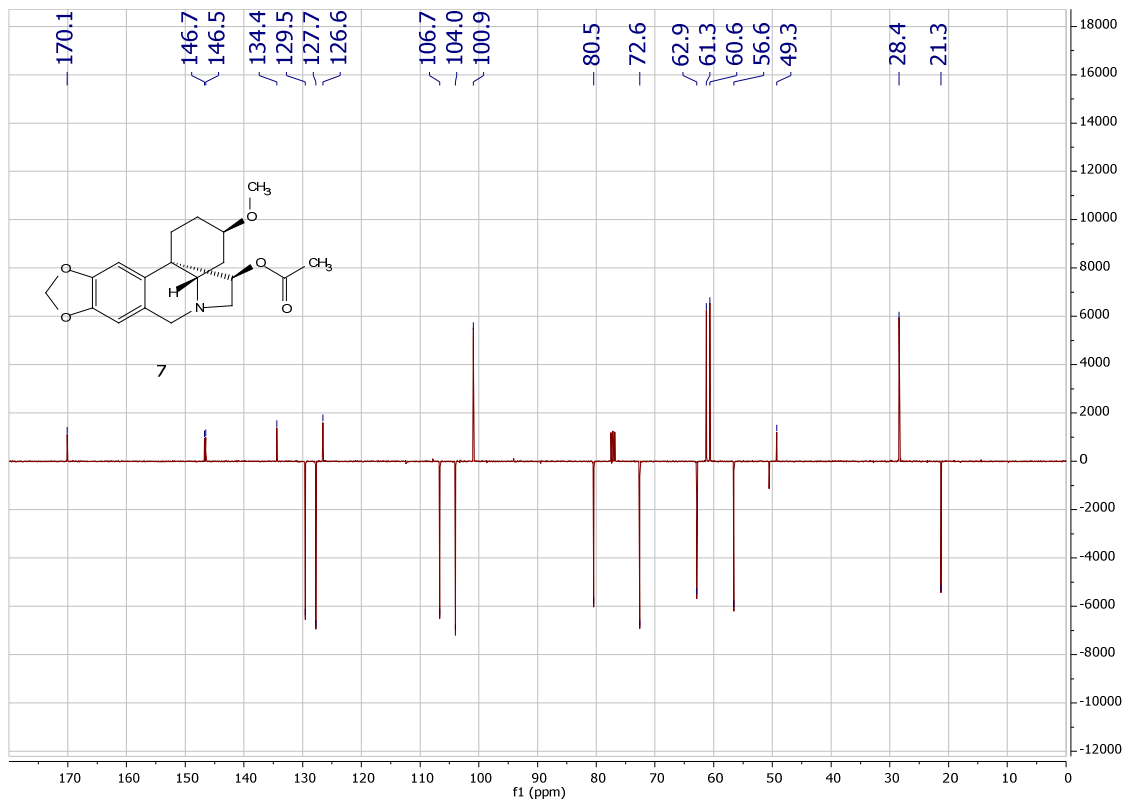

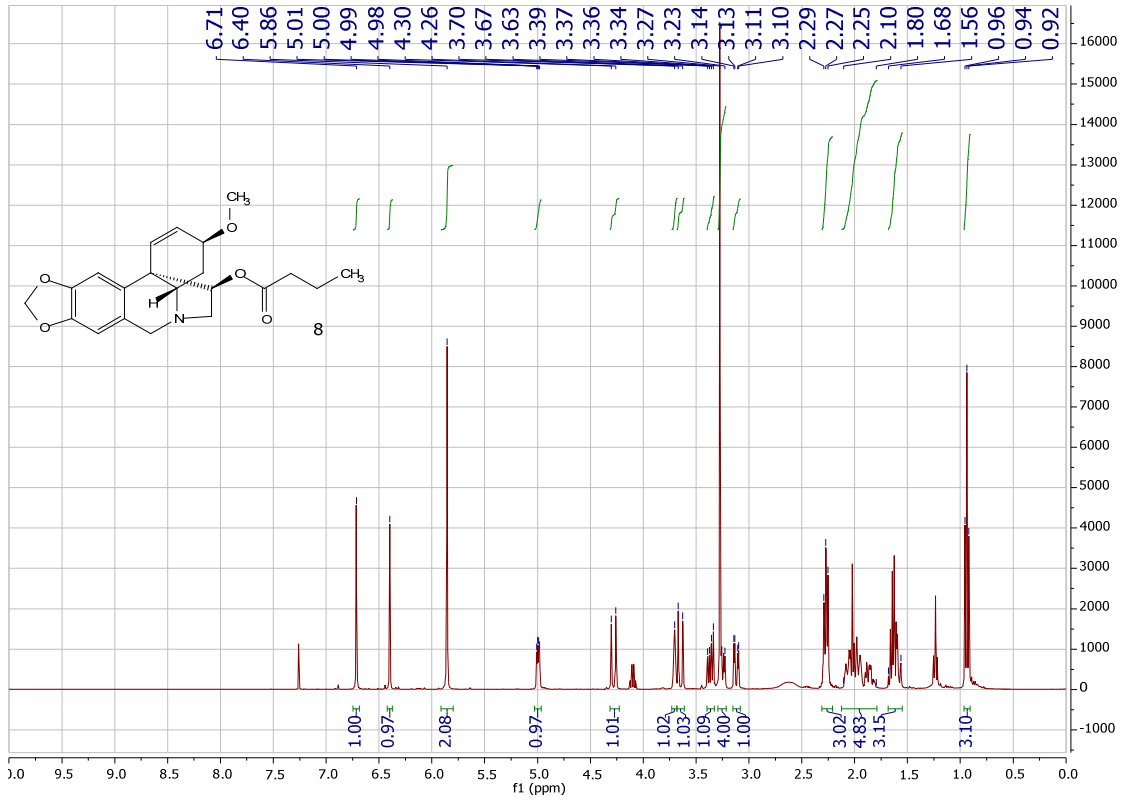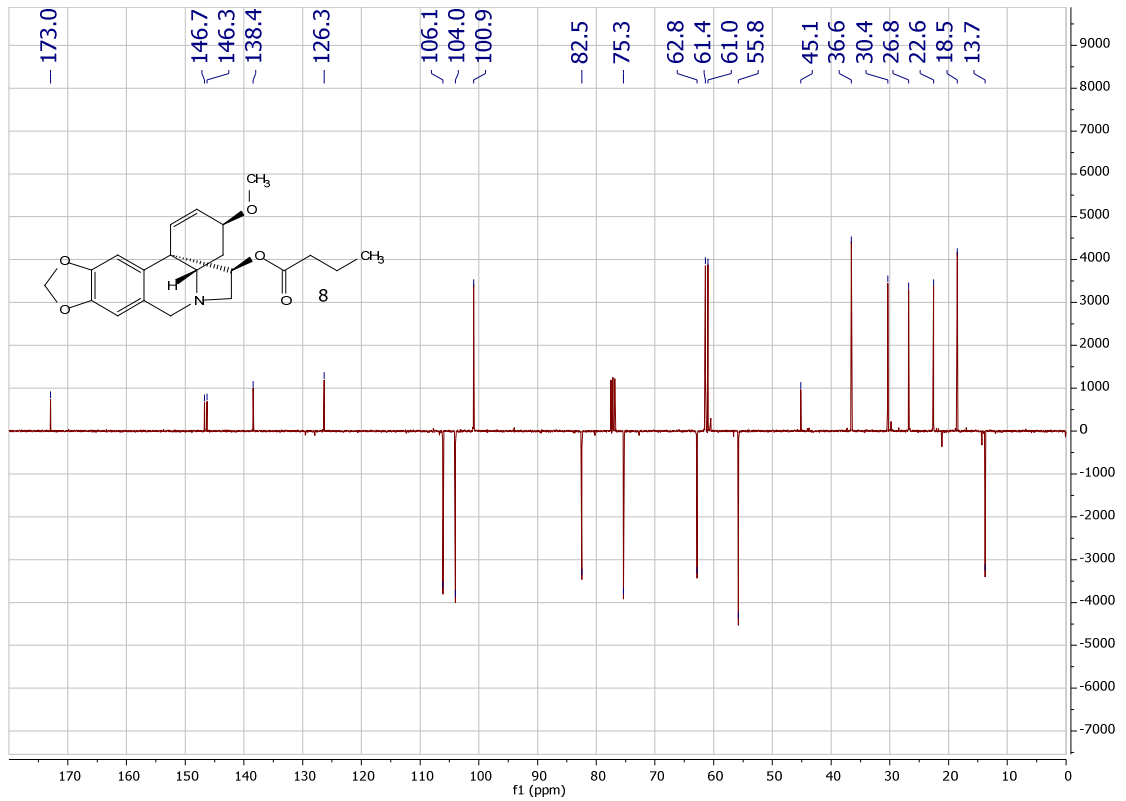

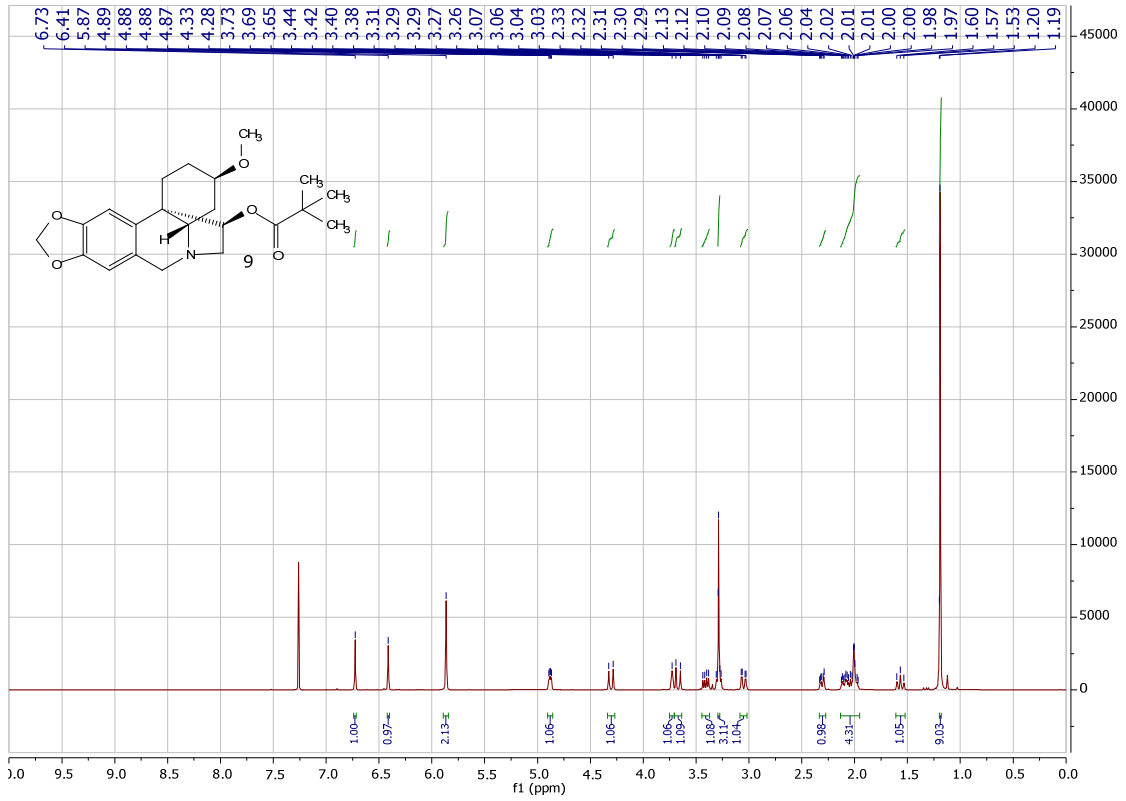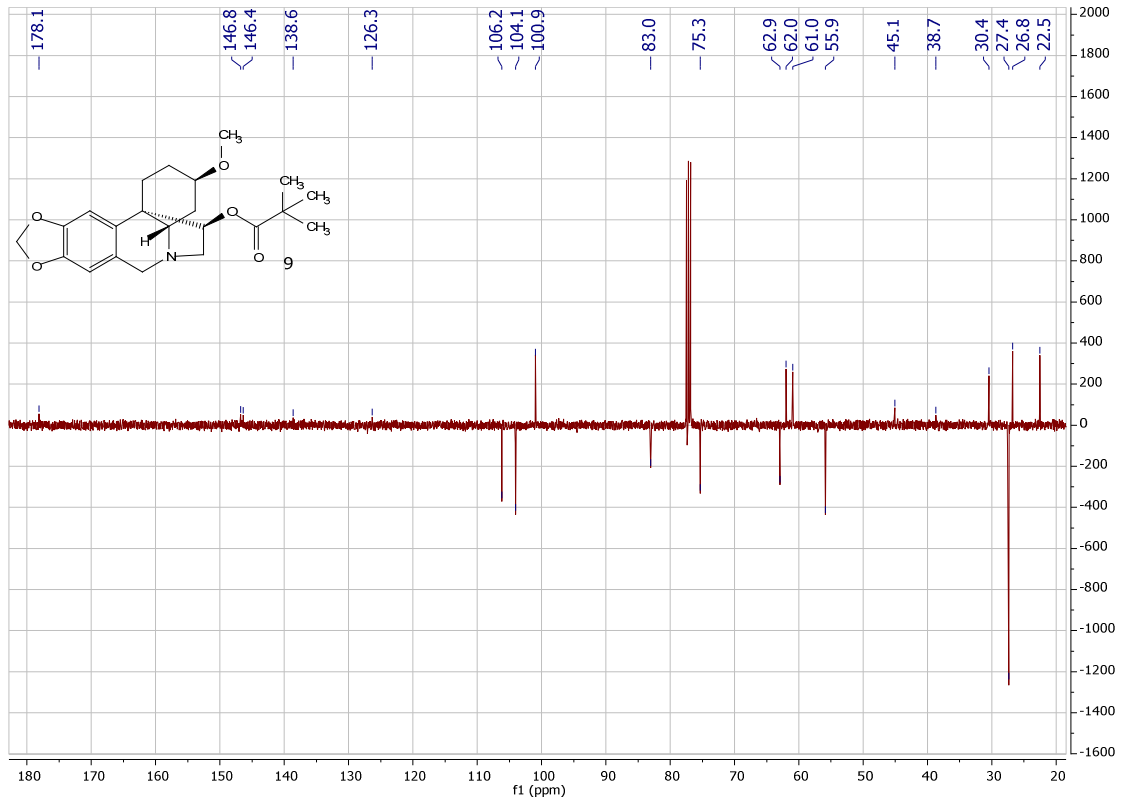



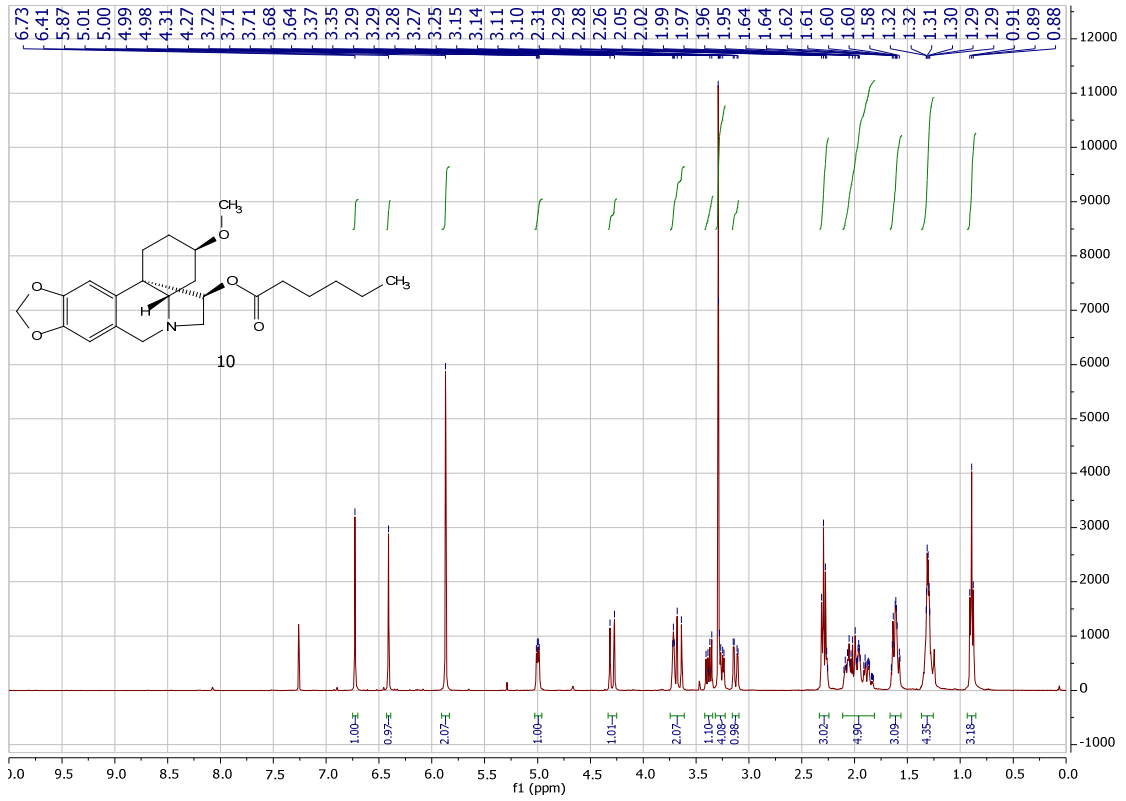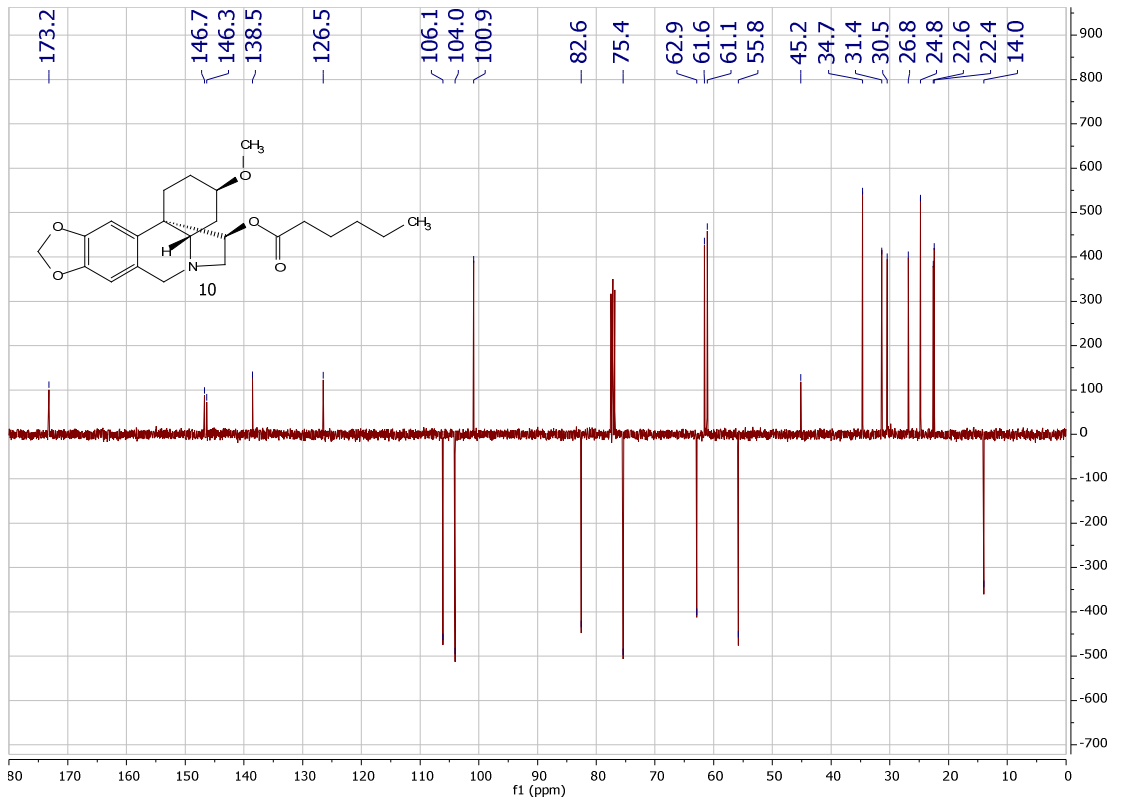

Filename: SI proofs  
Directory: H:  
Template: C:\Users\eramos-  
morales\AppData\Local\Microsoft\Windows\Temporary Internet  
Files\Content.MSO\7E4C691B.dotm  
Title:  
Subject:  
Author: Eva  
Keywords:  
Comments:  
Creation Date: 18/01/2019 12:59:00  
Change Number: 3  
Last Saved On: 18/01/2019 12:59:00  
Last Saved By: Eva Ramos-Morales  
Total Editing Time: 2 Minutes  
Last Printed On: 18/01/2019 15:31:00  
As of Last Complete Printing  
Number of Pages: 17  
Number of Words: 2,504 (approx.)  
Number of Characters: 14,275 (approx.)
